RESEARCH ARTICLE

# Interactions of Isophorone Derivatives with DNA: Spectroscopic Studies

Marco Deiana<sup>1</sup>, Katarzyna Matczyszyn<sup>1\*</sup>, Julien Massin<sup>2</sup>, Joanna Olesiak-Banska<sup>1</sup>, Chantal Andraud<sup>2</sup>, Marek Samoc<sup>1</sup>

**1** Advanced Materials Engineering and Modelling Group, Faculty of Chemistry, Wrocław University of Technology, Wyb. Wyspińskiego 27, 50–370, Wrocław, Poland, **2** Laboratoire de Chimie, CNRS UMR 5182, Ecole Normale Supérieure de Lyon, Université Lyon 1, Lyon, France

\* [katarzyna.matczyszyn@pwr.edu.pl](mailto:katarzyna.matczyszyn@pwr.edu.pl)

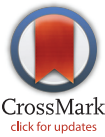

**OPEN ACCESS**

**Citation:** Deiana M, Matczyszyn K, Massin J, Olesiak-Banska J, Andraud C, Samoc M (2015) Interactions of Isophorone Derivatives with DNA: Spectroscopic Studies. PLoS ONE 10(6): e0129817. doi:10.1371/journal.pone.0129817

**Academic Editor:** Heidar-Ali Tajmir-Riahi, University of Quebec at Trois-Rivieres, CANADA

**Received:** March 28, 2015

**Accepted:** May 12, 2015

**Published:** June 12, 2015

**Copyright:** © 2015 Deiana et al. This is an open access article distributed under the terms of the [Creative Commons Attribution License](https://creativecommons.org/licenses/by/4.0/), which permits unrestricted use, distribution, and reproduction in any medium, provided the original author and source are credited.

**Data Availability Statement:** All relevant data are within the paper.

**Funding:** The financing from NCN Opus grant DEC-2013/09/B/ST5/03417 is highly acknowledged. The authors thank the Région Rhône-Alpes (cluster5) for a grant to J.M. and financial support. The funders had no role in study design, data collection and analysis, decision to publish, or preparation of the manuscript.

**Competing Interests:** The authors have declared that no competing interests exist.

**Abbreviations:** Iso, isophorone; DNA, deoxyribonucleic acid; ds, double-stranded; ss,

## Abstract

Interactions of three new isophorone derivatives, Isoa IsoB and IsoC with salmon testes DNA have been investigated using UV-Vis, fluorescence and circular dichroism spectroscopic methods. All the studied compounds interact with DNA through intercalative binding mode. The stoichiometry of the isophorone/DNA adducts was found to be 1:1. The fluorescence quenching data revealed a binding interaction with the base pairs of DNA. The CD data indicate that all the investigated isophorones induce DNA modifications.

## Introduction

A number of studies have indicated that deoxyribonucleic acid (DNA) can be an interesting material not only for biological aspects but also for applications in photonics and electronics [1], [2]. With this in mind, our group has investigated the nonlinear optical properties of well-known intercalators and minor groove binders, such as ethidium bromide and Hoechst 33258 by Z-scan and two-photon fluorescence light microscopy techniques [3–7] gaining expertise in the field of DNA studies. The binding mechanism of small molecules to biomolecules such as ds-DNA, ss-DNA and proteins has attracted the attention of many research groups and is an active area in the field of biochemistry and medicinal chemistry [8–12]. DNA, being a biodegradable material can have advantages over synthetic polymers which usually are characterized by a very long degradation time [13]. DNA can act as a host for luminescent chromophores: as an example, the DNA-CTMA complex (CTMA:cetyltrimethylammonium chloride) has been shown to be a good matrix for photonic applications [1]. A DNA chain presents sites suitable for various modes of interaction with small molecules, such as intercalation, groove and external binding [14], [15]. Intercalating agents, containing planar heterocyclic groups which stack between adjacent DNA base pairs, can inhibit DNA replication in rapidly growing cancer cells [16], [17]. The complex formed by intercalation is thought to be stabilized, among other factors, by  $\pi$ - $\pi$  stacking interactions between the drug (the intercalator) and DNA bases [15]. Intercalators introduce strong structural perturbations to DNA. On the other hand, groove binding molecules complement the shape of the groove via van der Waals interactions [18], [19]. The third mentioned type of interaction, the external binding, refers to electrostatic

single-stranded; ct, calf thymus; CTMA, cetyltrimethylammonium chloride; PMMA, poly(methyl methacrylate); CD, circular dichroism; ICD, induced circular dichroism.

association between molecules that are charged positively and the DNA phosphate sugar backbone, e.g. cations as  $Mg^{2+}$  and Ru(II) complexes that are positively charged, interact electrostatically with the DNA phosphate that is negatively charged [20], [21].

In this context, Massin et al. [22] have synthesized some isophorone derivatives and compared their photoluminescence when embedded in DNA-CTMA and poly(methyl methacrylate) (PMMA) matrices [1]. Although no conclusions on intercalation or groove binding of chromophores in the case of DNA-CTMA matrices could be obtained, they showed that the photoluminescence spectra were related to the different interactions which are established between isophorone derivatives and either DNA-CTMA or PMMA, concluding that those with PMMA were stronger than those with DNA-CTMA. Such interactions influence the luminescence efficiency of the chromophore, therefore it is important to determine their nature. Such knowledge is essential for design of new isophorones that would be able to bind to DNA in an optimal way and would enable design of a new fully biodegradable material for photonics.

The aim of this study was to determine the binding mechanism of three push-pull dipolar chromophores made based on the dicyanoisophorone electron acceptor group and varying by the substituent on the donor side [22]. The studies were performed with salmon testes DNA by using UV-Vis, fluorescence and circular dichroism spectroscopies, under physiological pH conditions (7.25). The UV-Vis and fluorescence data allow one to calculate the apparent binding constant and the coordination mode while the circular dichroism can give important information about the occurrence of DNA conformational changes.

## Materials and Methods

### Synthesis

The synthesis of Isoa, b and c has been described previously [22].

### Apparatus

UV-Vis absorption spectra were recorded on a Cary 60 UV-Vis spectrometer (Agilent Technologies). All measurements were carried out with a 1.0 cm path length quartz cell. Fluorescence analyses were carried out with a Hitachi F-4500 spectrofluorometer equipped with a xenon lamp and a thermostated bath. Circular dichroism spectra were recorded with a Jasco J-815 spectropolarimeter (Jasco Inc, USA) equipped with a Jasco Peltier-type temperature controller (CDF-426S/15). A Metrohm 902 Titrand digital pH meter equipped with Tiamo 2.3 software was used to detect the pH values of the solutions.

### Reagents and preparation of stock solutions

Common reagent-grade chemicals were used without further purification. The stock solution of deoxyribonucleic acid sodium salt from salmon testes, purchased from Sigma Aldrich Chem. Co., was prepared by dissolving an appropriate amount of solid DNA powder in 1 mM sodium cacodylate buffer (pH 7.25). The stock solution was stored at 4°C for 24 hours with occasional stirring and was used after no more than 3 days. The appropriate DNA solution concentrations were determined by absorption spectrometry using the molar absorptivity  $\epsilon_{260} = 13200 \text{ M}^{-1} \text{ cm}^{-1}$ . The purity of the DNA was checked by monitoring the ratio of the absorbance at 260 and 280 nm and at 260 and 230 nm giving values higher than 1.8 and 2.2, respectively, thus showing DNA being sufficiently free from protein impurities. Stock solutions were prepared by dissolving appropriate amounts of each isophorone in DMSO to final concentrations of 2.5, 1.25, 0.625 and 0.312 mM. The stock solutions were held protected from light by wrapping the vials with aluminum foil.

## UV-Vis measurements of DNA complex formation

UV-Vis absorption spectra were recorded by adding Isoa, b and c from the stock solutions dropwise to 30.9  $\mu\text{M}$  DNA solution and by keeping constant the isophorone concentration (7.5  $\mu\text{M}$ ) with incremental addition of 30.9  $\mu\text{M}$  DNA solution. The spectroscopic measurements at the different isophorone-DNA ratios were made in triplicate, at room temperature, and recorded after three minutes to permit the equilibrium between the species. Appropriate mixtures of DMSO and cacodylate buffer were used as reference.

## Fluorescence measurements

A fixed concentration of each isophorone was titrated with incremental addition of DNA and the fluorescence measurements were performed keeping the excitation and emission band slit width of 5.0 nm and after allowing a three minutes equilibration for each DNA addition. A fluorescence free quartz cell of 1 cm path length was used.

## Circular dichroism measurements

The CD spectra were recorded at room temperature in the wavelength range of 200–700 nm, at different Iso/DNA ratios and constant DNA concentration. Before use, the optical chamber of the CD spectrometer was deoxygenated with dry nitrogen and was held under nitrogen atmosphere during the measurements. Each spectrum was averaged from five successive accumulations.

## Results and Discussion

### Spectrophotometric studies

It has been established that the strength of binding of organic molecules (drugs) with DNA helix can be quantified through spectral titration [21], [23–27]. The UV-Vis spectra of the isophorone derivatives, whose structures are reported in Fig 1, are characterized by a strong absorption band in the visible region between 460–560 nm. The UV-Vis spectra of the different Iso-DNA systems show the typical DNA band centered at 260 nm, whose intensity increases as the isophorone concentration increases. Based upon the variation in absorbance at 260 nm, the apparent binding (or association) constant  $K_a$  of the isophorones with DNA was calculated by using the following equation [15], [28]:

$$1/(A - A_0) = 1/(A_\infty - A_0) + 1/[\text{Iso}] \cdot 1/K_a(A_\infty - A_0) \quad (1)$$

where  $A_0$  and  $A$  are the absorbances of DNA in the absence and in the presence of the isophorones respectively, and  $A_\infty$  is the final absorbance of the Iso-DNA adduct.

For each isophorone, four systems were studied, keeping constant the concentration of DNA (0.31 mM) treated with different isophorone concentrations. The plots of  $1/(A - A_0)$  vs.  $1/[\text{Iso}]$  were linear and the binding constant  $K$  was calculated from the ratio of the intercept to the slope. As an example, Fig 2 shows the double reciprocal plots of results obtained on adding dropwise the isophorones from the stock solution 0.625 mM to 30.9  $\mu\text{M}$  DNA solution.

The average values of the binding constant for each Iso:DNA complex are reported in Table 1.

The  $K$  binding constant values reported here are smaller than those typically found for the well-known intercalators such as Methylene Blue-DNA ( $K = 2.13 \cdot 10^4 \text{ M}^{-1}$ ) and Ethidium Bromide-DNA ( $K = 6.58 \cdot 10^4 \text{ M}^{-1}$ ) [28], but agree well with those reported for Psoralen-DNA [29], and Naphthoxazole-DNA [30], where intercalative mode of interactions had been assigned.

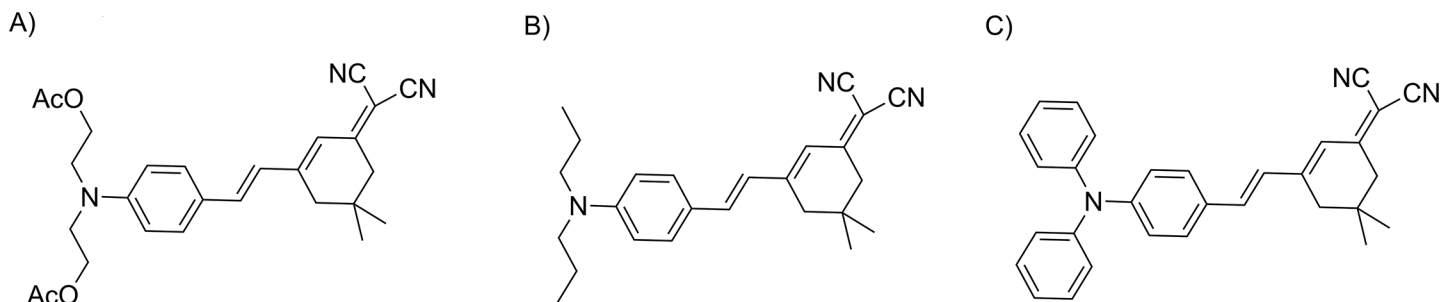

**Fig 1. Chemical structures.** Structures of: A) Isoa, B) Isob and C) Isoc.

doi:10.1371/journal.pone.0129817.g001

The active parts of the three isophrones investigated here are exactly the same thus the highest binding constant recorded for Isoc-DNA should be related to its shape as it contains two additional aromatic rings which can increase its planarity providing a greater accessibility inside the base pairs of DNA.

### UV-Vis of the isophrones derivatives-DNA interactions

In order to gain more information on the mode of binding between DNA and isophrones a-c, additional UV-Vis studies were carried out in which the concentration of the isophrones was kept constant (7.5  $\mu\text{M}$ ) and the DNA concentration was varied.

UV-Vis spectroscopy can provide important information on the mode of binding of dyes or drugs to DNA. For example, the absorbance peak can shift to longer (bathochromism) or shorter (hypsochromism) wavelengths, indicating structural changes of DNA. Binding to the DNA through intercalation usually results in such behavior. The intercalative mode involves a stacking interaction between an aromatic chromophore and the base pair of DNA and the extent of the hypochromism is related to the strength of intercalative interaction [14], [15]. Hyperchromic (increase of DNA absorbance) and hypsochromic effects can be related to a strong intercalative binding of drugs, such as Methotrexate, and DNA [31]. An intercalative interaction mode has been proposed for Fagaronine, Ethoxidine and Methyl Red, for which a hypsochromic effect was detected after the DNA addition [32].

Isophrones a and b show an absorption band ( $\lambda_{\text{max}}$ ) at 485 and 495 nm, respectively, which decreases as DNA concentration increases (hypochromic effect) with a red shift of 7 and 5 nm, respectively. On the other hand, isophorone c shows an absorption band ( $\lambda_{\text{max}}$ ) at 490

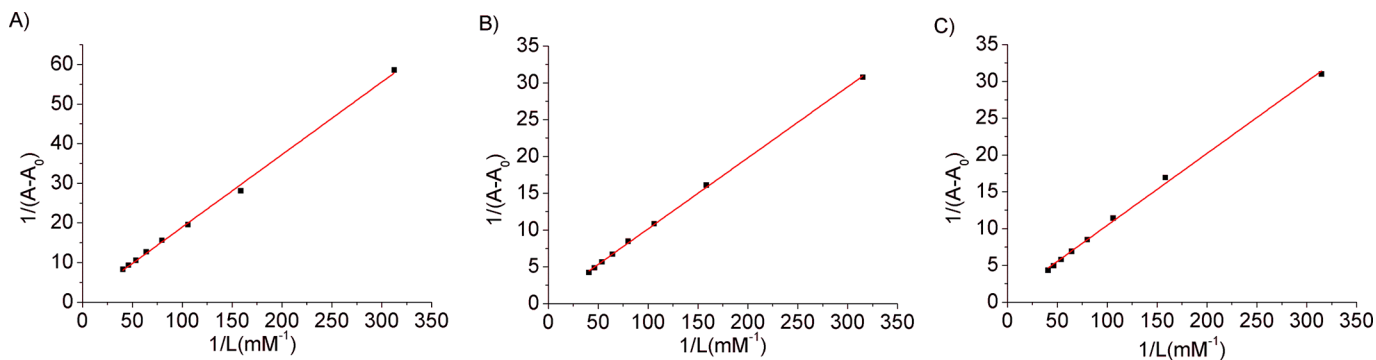

**Fig 2. Binding constant determination.** Plots of  $1/(A-A_0)$  vs.  $1/\text{Isophorone concentration}$  for DNA and their isophorone complexes.  $A_0$  is the absorbance of DNA (at 260 nm) and  $A$  is the absorbance after isophorone addition.

doi:10.1371/journal.pone.0129817.g002

**Table 1. Average values of the binding constants for the studied systems.**

| Isoa-DNA                         | Isob-DNA                         | Isoc-DNA                         |
|----------------------------------|----------------------------------|----------------------------------|
| $3.36 \cdot 10^3 \text{ M}^{-1}$ | $5.40 \cdot 10^3 \text{ M}^{-1}$ | $6.89 \cdot 10^3 \text{ M}^{-1}$ |

Average *K* values calculated by using the Benesi–Hildebrand equation for all the isophorone-DNA systems studied.

doi:10.1371/journal.pone.0129817.t001

nm, whose intensity decreases slightly (hypochromic effect) without any band shift (Fig 3). These findings suggest that all the isophrones studied interact with DNA mainly through a stacking interaction between the aromatic chromophore and the base pair of DNA.

### Determination of the binding parameters

The mole-ratio method was employed to evaluate the isophorone-DNA binding stoichiometries, keeping constant the concentration of the isophrones and varying that of DNA. The plots of the difference in absorption intensity ( $A_0 - A$ ) at 485 and 495 nm for Isoa and b, respectively, versus the DNA/Iso mole ratio of the corresponding isophorone are indicative of a single binding mode in each case, as revealed by one break point. From the inflection points the molar ratio DNA/Isoa and DNA/Isob results to be equal to 1.0 and 0.9, respectively. Therefore, the number of base pairs of DNA bound per Isoa and b can be estimated to be around 1.0 and 0.9, respectively. This value is in good agreement with that found for the intercalator Naphthoxazole for which a 1:1 stoichiometry was assigned [30]. As an example, Fig 4 shows the mole ratio plot for the DNA-Isoa system. It was not easy to determine the stoichiometry for Isoc due to the slight hypochromic effect of the band at 490 nm. However the plot obtained is in agreement with those found for Isoa and Isob and indicates that the number of base pairs involved in the interaction with Isoc is still one.

### Fluorescence titration studies

The isophorone-DNA systems were also studied by fluorescence spectroscopy, keeping constant the isophorone concentration and varying that of DNA. The studied molecules show intense fluorescence. The emission spectra of Isoa, b and c (Fig 5) are characterized by a maximum centered at 655, 674 and 672 nm, respectively.

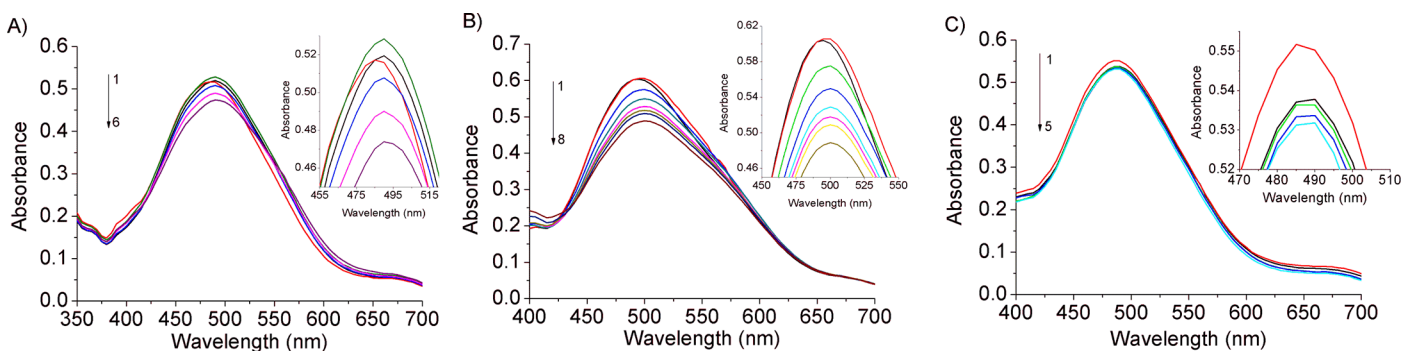

**Fig 3. Interaction of the isophorone derivatives in presence of ds-DNA.** UV-Vis absorption spectra of: A) Isoa (7.5 μM) treated with: 0.0, 1.5, 3.0, 6.0, 7.5, 10.5 μM (curves 1–6) of DNA. B) Isob (7.5 μM) treated with: 0.0, 1.5, 3.0, 4.5, 6.0, 7.5, 9.0, 13.5 μM (curves 1–8) of DNA. C) Isoc (7.5 μM) treated with: 0.0, 1.5, 6.0, 7.5, 10.5 μM (curves 1–5) of DNA. All the experiments were carried out at room temperature in sodium cacodylate trihydrate 1 mM (pH 7.25). Inset: Absorption spectra highlights of A) Isoa, B) Isob and C) Isoc with DNA.

doi:10.1371/journal.pone.0129817.g003

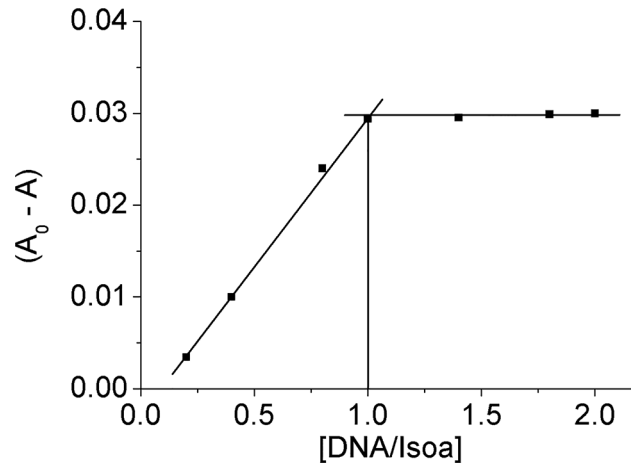

**Fig 4. Binding stoichiometry.** Mole ratio plot of Isoa-DNA system.

doi:10.1371/journal.pone.0129817.g004

With increasing concentration of DNA, progressive quenching was observed for Isoa, b and c revealing a binding interaction taking place. It is well known that the fluorescence quenching can be static, resulting from the formation of a fluorophore-quencher complex or dynamic usually ascribed to the diffusive encounter between the fluorophore and the quencher [33]. In order to distinguish and ascertain quantitatively the possible quenching mechanism the Stern-Volmer equation was used [33], [34]:

$$F_0/F = 1 + K_q \tau_0 [Q] = 1 + K_{sv} [Q] \tag{2}$$

where  $F_0$  and  $F$  are the fluorescence intensity in absence and presence of DNA, respectively.  $K_q$  is the quenching rate constant of the biomolecules,  $K_{sv}$  is the Stern-Volmer quenching constant,  $[Q]$  is the concentration of DNA and  $\tau_0$  is the average excited-state lifetime of biomolecules without a quencher and it is equal to  $10^{-8}$  s [34]. From the plots of Eq 2 (Fig 6), the values of  $K_{sv}$  and  $K_q$  were obtained for all the Iso-DNA systems studied and are listed in Table 2.

For dynamic quenching, the maximum diffusion collisional quenching rate of various quenchers with biopolymers is about  $2.0 \times 10^{10} \text{ M}^{-1} \text{ s}^{-1}$  [35]. Since the values of  $K_q$  were much

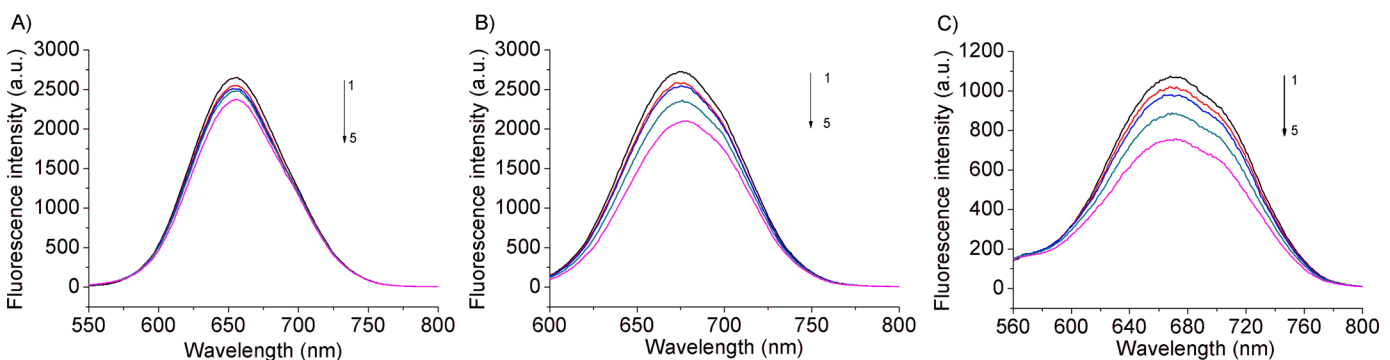

**Fig 5. Interaction of the isophorone derivatives with DNA studied using fluorescence spectroscopy.** Fluorescence emission spectra of: A) Isoa (15.6 μM) treated with: 0.0, 9.90, 19.80, 47.16, 86.21 μM (curves 1–5) of DNA ( $\lambda_{exc} = 500$  nm). B) Isob (15.6 μM) treated with: 0.0, 9.90, 19.80, 47.16, 86.21 μM (curves 1–5) of DNA ( $\lambda_{exc} = 515$  nm). C) Isoc (15.6 μM) treated with: 0.0, 9.90, 19.80, 47.16, 86.21 μM (curves 1–5) of DNA ( $\lambda_{exc} = 510$  nm). All the experiments were carried out at room temperature.

doi:10.1371/journal.pone.0129817.g005



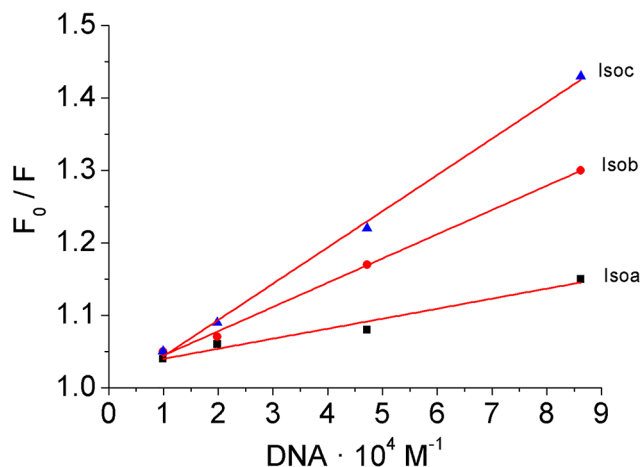

**Fig 6. Stern-Volmer plots for the fluorescence quenching of Isoa-c by DNA.** Plot of the ratio of the isophorone derivatives fluorescence intensity before and after incremental addition of DNA as a function of the quencher concentration for the determination of the Stern-Volmer quenching rate constant.

doi:10.1371/journal.pone.0129817.g006

greater than  $2.0 \times 10^{10} \text{ M}^{-1} \text{ s}^{-1}$  the quenching can be ascribed to the formation of Iso-DNA complex confirming the static mechanism.

In order to provide further insights in the association process the binding constants ( $K_f$ ) and the number of binding sites ( $n$ ) involved in the Iso-DNA systems were calculated according to the following equation [36]:

$$\log [(F_0 - F)/F] = \log K_f + n \log [Q] \quad (3)$$

The plots of  $\log [(F_0 - F)/F]$  versus  $\log [Q]$  are linear (Fig 7) and the values of  $K_f$  and  $n$ , shown in Table 2 have been obtained from the intercept and the slope, respectively.

The calculated binding constants for the Iso-DNA systems are slightly lower than those calculated by absorption spectroscopy due to the difference in the method used [37]. However, the magnitude of the evaluated association constants still confirms the higher affinity of Isoc, with respect to Isoa and Isob, to the DNA base pairs, which is in agreement with the data derived from UV-Vis spectroscopy.

### Spectroscopic study using circular dichroism

In order to verify if the studied isophorones are able to induce DNA conformational changes, circular dichroism measurements were recorded in the 200–700 nm range with the DNA concentration kept constant and varying that of the isophorones. The CD spectrum of salmon

**Table 2. Stern-Volmer ( $K_{sv}$ ), quenching rate constant ( $K_q$ ), association constants ( $K_f$ ) and number of binding sites ( $n$ ) of the interaction between Isoa-c and DNA.**

|      | $K_{sv} \text{ M}^{-1}$ | $K_q \text{ M}^{-1} \text{ s}^{-1}$ | $K_f \text{ M}^{-1}$ | $n$  |
|------|-------------------------|-------------------------------------|----------------------|------|
| Isoa | $1.38 \cdot 10^3$       | $1.38 \cdot 10^{11}$                | 187.6                | 0.74 |
| Isob | $3.35 \cdot 10^3$       | $3.35 \cdot 10^{11}$                | 383.7                | 0.77 |
| Isoc | $5.01 \cdot 10^3$       | $5.01 \cdot 10^{11}$                | 4507.1               | 0.99 |

Determination of the main parameters for the Isophorone-DNA systems calculated by using the Stern-Volmer relationship.

doi:10.1371/journal.pone.0129817.t002

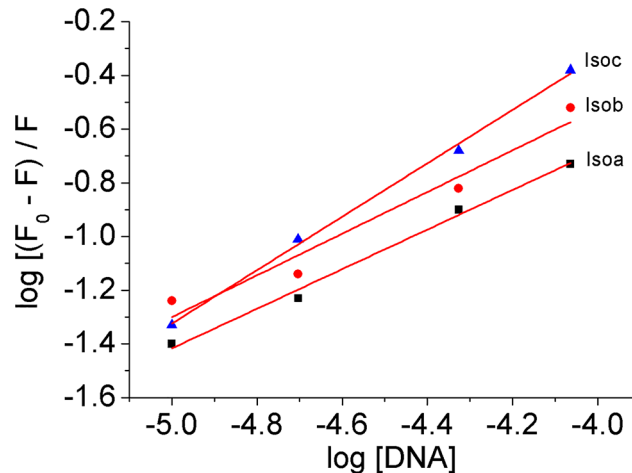

**Fig 7. Plot of  $\log [(F_0-F)/F]$  vs.  $\log [DNA]$ .** Determination of the binding constant and number of binding sites for the Iso-DNA systems.

doi:10.1371/journal.pone.0129817.g007

testes DNA is characterized by two bands: a negative one at  $\approx 245$  nm and a positive one at  $\approx 275$  nm, which are due to helicity and to stacking interactions among the base pairs [38], and are sensitive to the interaction with isophrones [39]. After addition of the isophrones an ICD band is revealed in each system studied. In particular, bands in the 360–430 nm, 510–525 nm and 470–544 nm range appear in the Isoa, b and c-DNA system, respectively. The induced circular dichroism bands, as found in the investigation of the interaction between the anticancer drug mitoxantrone with DNA, are much smaller in intensity as compared to the positive and negative DNA bands and their variation cannot be determined due to large noise in those regions [40]. However, the presence of these bands reveals that all the isophorone derivatives are able to interact with ds-DNA.

For Isoa (Fig 8A), the band at 275 nm decreases after the first addition of  $C_{\text{isoa}} = 12.82 \mu\text{M}$ , but increases linearly up to  $C_{\text{isoa}} = 62.81 \mu\text{M}$ , which is accompanied by a slight blue shift and a total change in ellipticity of 0.65 mdeg. The intensity of the band at 245 nm decreases linearly up to  $C_{\text{isoa}}$  concentration of 38.07  $\mu\text{M}$  while an increasing (shifting toward zero) at  $C_{\text{isoa}}$  62.81  $\mu\text{M}$  is observed with a total change in ellipticity of 0.20 mdeg. The changes of the CD

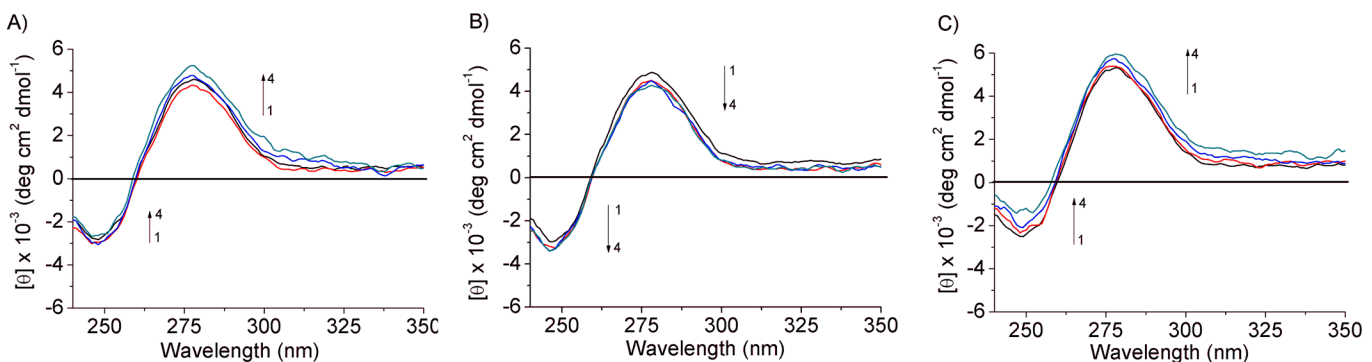

**Fig 8. Effect of the isophorone derivatives on the DNA conformation.** Circular dichroism (CD) spectra of DNA (30.9  $\mu\text{M}$ ) treated with: A) 0.0 (black line), 12.82 (red line), 38.07 (blue line), 62.81 (green line)  $\mu\text{M}$  (curves 1–4) of Isoa, B) 0.0 (black line), 12.82 (red line), 38.07 (blue line), 62.81 (green line)  $\mu\text{M}$  (curves 1–4) of Isob, C) 0.0 (black line), 12.82 (red line), 38.07 (blue line), 62.81 (green line)  $\mu\text{M}$  (curves 1–4) of Isoc.

doi:10.1371/journal.pone.0129817.g008



signal indicate that Isoa interacts with the base pairs of salmon testes DNA through the aromatic rings.

For isoc the bands at 275 and 245 increase continuously (Fig 8C) giving a total change in ellipticity of 0.65 and 1.23 mdeg, respectively, indicating an interaction similar to that recorded for Isoa. The conformational changes induced by both Isoa and c are indicative of an intermediate stage of B-to-A DNA transition in which the B-conformation is still predominant. A similar trend was observed in the study of the interaction between Cyanazine [41] and Psoralen [29] with calf thymus DNA in which intercalation binding had been confirmed.

On the other hand, the bands at 275 and 245 nm decrease linearly after each addition of Isob (Fig 8B) with a simultaneous slight red and blue shift of the positive and negative bands, respectively, indicating the existence of an interaction with nucleic acid.

The results suggest that the destabilization of the B-DNA moiety arises from the insertion of Isob between base pairs of DNA leading to changing the right-handed DNA helicity. Similar conclusions were reported about the interaction of Prodigiosin with ct-DNA [42].

## Conclusions

The data obtained from spectrophotometric measurements indicate that all the studied isophorones interact with DNA, the affinity of Isoc to DNA being the highest. The UV-Vis spectra, recorded by keeping constant the concentration of isophorones and increasing the DNA concentration, suggest that the isophorones interact with DNA mainly through a stacking interaction between the aromatic chromophore and the base pair of DNA with a 1:1 stoichiometry.

The fluorescence data are consistent with the findings drawn from the UV-Vis data and confirm the interactions with DNA.

The CD data clearly indicate that the isophorones induce DNA modifications. In particular, Isoa and c act in a similar way with the base pairs of DNA, on the other hand Isob mainly disturbs the right handed helicity of DNA.

## Acknowledgments

We thank Yann Bretonnière for careful reading of the manuscript and comments on measurements. Mirosława Rozycka is highly acknowledged for the help with the CD measurements. The financing from NCN Opus grant DEC-2013/09/B/ST5/03417 is highly acknowledged. The authors thank the Région Rhône-Alpes (cluster5) for a grant to J.M. and financial support. The funders had no role in study design, data collection and analysis, decision to publish, or preparation of the manuscript.

## Author Contributions

Conceived and designed the experiments: KM CA MD. Performed the experiments: MD JM KM. Analyzed the data: MD KM JOB CA MS. Contributed reagents/materials/analysis tools: KM CA MS. Wrote the paper: MD KM JOB CA MS.

## References

1. Massin J, Parola S, Andraud C, Kajzar F, Rau I. Enhanced fluorescence of isophorone derivatives in DNA based materials. *Opt. Mater.* 2013; 35: 1810–1816.
2. Grote JG, Hagen JA, Zetts JS, Nelson RL, Diggs DE, Stone MO, et al. Investigation of polymers and marine-derived DNA in optoelectronics. *J. Phys. Chem. B* 2004; 108: 8548–8591.
3. Delplanque A, Wawrzyńczyk D, Jaworski P, Matczyszyn K, Pawlik K, Buckle M, et al. DNA base pair resolution measurements using resonance energy transfer efficiency in lanthanide doped nanoparticles. *PLOS ONE*. 2015; 10: e0117277. doi: [10.1371/journal.pone.0117277](https://doi.org/10.1371/journal.pone.0117277) PMID: [25748446](https://pubmed.ncbi.nlm.nih.gov/25748446/)

4. Samoć M, Matczyszyn K, Nyk M, Olesiak-Bańska J, Gordel M, Hańczyc P, et al. Nonlinear absorption in nanosystems of biological significance. *MRS Proceedings*. 2014; 1698.
5. Olesiak-Bańska J, Matczyszyn K, Zale ny R, Murugan NA, Kongsted J, Agren H, et al. Revealing spectral features in the two-photon absorption spectrum of the hoechst 33342 dye: a combined experimental and quantum-chemical study. *J. Phys. Chem. B*. 2013; 117: 12013–12019. doi: [10.1021/jp407144k](https://doi.org/10.1021/jp407144k) PMID: [24016295](https://pubmed.ncbi.nlm.nih.gov/24016295/)
6. Matczyszyn K, Olesiak-Bańska J. DNA as scaffolding for nanophotonic structures. *J. Nanophoton*. 2012; 6: 064505.
7. Olesiak-Bańska J, Hańczyc P, Matczyszyn K, Norden B, Samoć M. Nonlinear absorption spectra of ethidium and ethidium homodimer. *Chem. Phys*. 2012; 404: 33–35.
8. Kabiri M, Amiri-Tehranizadeh Z, Baratian A, Saberi MR, Chamani J. Use of spectroscopic, zeta potential and molecular dynamic techniques to study the interaction between human holo-transferrin and two antagonist drugs: comparison of binary and ternary systems. *Molecules*. 2012, 17: 3114–3147. doi: [10.3390/molecules17033114](https://doi.org/10.3390/molecules17033114) PMID: [22410420](https://pubmed.ncbi.nlm.nih.gov/22410420/)
9. Bourassa P, Thomas TJ, Tajmir-Riahi HA. Locating the binding sites of antitumor drug tamoxifen and its metabolites with DNA. *J Pharm Biomed Anal*. 2014, 95: 193–199. doi: [10.1016/j.jpba.2014.02.028](https://doi.org/10.1016/j.jpba.2014.02.028) PMID: [24682017](https://pubmed.ncbi.nlm.nih.gov/24682017/)
10. Marshall MM, Ruzicka J, Zahid OK, Henrich VC, Taylor EW, Hall AR. Nanopore analysis of single-stranded binding protein interactions with DNA. *Langmuir*. 2015, 31: 4582–4588. doi: [10.1021/acs.langmuir.5b00457](https://doi.org/10.1021/acs.langmuir.5b00457) PMID: [25839962](https://pubmed.ncbi.nlm.nih.gov/25839962/)
11. Sarzehi S, Chamani J. Investigation on the interaction between tamoxifen and human holo-transferrin: determination of the binding mechanism by fluorescence quenching, resonance light scattering and circular dichroism methods. 2010, 47: 558–569. doi: [10.1016/j.ijbiomac.2010.08.002](https://doi.org/10.1016/j.ijbiomac.2010.08.002) PMID: [20708639](https://pubmed.ncbi.nlm.nih.gov/20708639/)
12. Sattar Z, Iranfar H, Asoodeh A, Saberi MR, Mazhari M, Chamani J. Interaction between holo transferrin and HSA–PPIX complex in the presence of lomefloxacin: An evaluation of PPIX aggregation in protein–protein interactions. 2012, 97: 1089–1100. doi: [10.1016/j.saa.2012.07.034](https://doi.org/10.1016/j.saa.2012.07.034) PMID: [22925987](https://pubmed.ncbi.nlm.nih.gov/22925987/)
13. Steckl AJ. DNA—a new material for photonics?. *Nature Photon*. 2007; 1: 3–5.
14. Nakamoto K, Tsuboi M, Strahan GD. Drug–DNA Interactions Structures and Spectra. *Method Biochem Anal*. 2008; 51: 1–366. PMID: [19230346](https://pubmed.ncbi.nlm.nih.gov/19230346/)
15. Sirajuddin M, Ali S, Badshah A. Drug–DNA interactions and their study by UV–Visible, fluorescence spectroscopies and cyclic voltammetry. *J. Photochem. Photobiol., B*. 2013; 124: 1–19. doi: [10.1016/j.jphotobiol.2013.03.013](https://doi.org/10.1016/j.jphotobiol.2013.03.013) PMID: [23648795](https://pubmed.ncbi.nlm.nih.gov/23648795/)
16. Lerman LS. Structural considerations in the interaction of deoxyribonucleic acid and acridines. *J. Mol. Biol*. 1961; 3: 18–30. PMID: [13761054](https://pubmed.ncbi.nlm.nih.gov/13761054/)
17. Barton JK, Olmon ED, Sontz PA. Metal complexes for DNA-mediated charge transport. *Coord. Chem. Rev*. 2011; 255: 619–634. PMID: [21643528](https://pubmed.ncbi.nlm.nih.gov/21643528/)
18. Cai X, Gray PJ, Von H, Daniel D. DNA minor groove binders: Back in the groove. *Cancer Treat Rev*. 2009; 35: 347–450.
19. Khalaf AI. Minor groove binders: Some recent research in drug development. *Curr Trends Med Chem*. 2009; 6: 53–63.
20. Lorusso D, Mainenti S, Pietragalla A, Ferrandina G, Foco G, Masciullo V, et al. Brostallicin (PNU-166196), a new minor groove DNA binder: Preclinical and clinical activity. *Expert Opin. Investig. Drugs*. 2009; 10: 1703–1714.
21. Biver T. Use of UV-Vis Spectrometry to Gain Information on the mode of binding of small molecules to DNAs and RNAs. *Appl. Spectrosc. Rev*. 2012; 47: 272–325.
22. Massin J, Dayoub W, Maulatier JC, Aronica C, Bretonnière Y, Andraud C. Near-Infrared solid-state emitters based on Isophorone: Synthesis, crystal structure and spectroscopic properties. *Chem. Mat*. 2011; 23: 862–873.
23. Stephanos JJ. Drug proteins interactions: two-site binding of heterocyclic ligands to a monomeric haemoglobin. *J. Inorg. Biochem*. 1996; 62: 155–162. PMID: [8627281](https://pubmed.ncbi.nlm.nih.gov/8627281/)
24. Zhong WY, Wang YC, Yu JS, Liang Y, Ni K, Tu S. The interaction of human serum albumin with a novel antidiabetic agent-SU-118. *J. Pharm. Sci*. 2004; 93: 1039–1046. PMID: [14999739](https://pubmed.ncbi.nlm.nih.gov/14999739/)
25. Ahmed Ouameur A, Marty R, Tajmir-Riahi HA. Human serum albumin complexes with chlorophyll and chlorophyllin. *Biopolymers* 2005; 77: 129–135. PMID: [15630698](https://pubmed.ncbi.nlm.nih.gov/15630698/)
26. Klotz MI, Hunston L. Properties of graphical representations of multiple classes of binding sites. *Biochemistry* 1971; 10: 3065–3069. PMID: [5126925](https://pubmed.ncbi.nlm.nih.gov/5126925/)

27. Purcell M, Novetta-Delen A, Arakawa H, Malonga H, Tajmir-Riahi HA. Interaction of RNase A with VO<sub>3</sub><sup>-</sup> and VO<sub>2</sub><sup>+</sup> ions. Metal ion binding mode and protein secondary structure. *J. Biomol. Struct. Dyn.* 1999; 17: 473–480. PMID: [10636082](#)
28. Nafisi S, Saboury AA, Keramat N, Neault JF, Tajmir-Riahi HA. Stability and structural features of DNA intercalation with ethidium bromide, acridine orange and methylene blue. *J. Mol. Struct.* 2007; 827: 35–43.
29. Zhou X, Zhang G, Wang L. Probing the binding mode of psoralen to calf thymus DNA. *Int. J. Biol. Macromol.* 2014; 67: 228–237. doi: [10.1016/j.ijbiomac.2014.03.038](#) PMID: [24685466](#)
30. Wang XZ, Jiang GB, Xie YY, Liu YJ. Synthesis, molecular structure, DNA interaction and antioxidant activity of novel naphthoxazole compound. *Spectrochim. Acta, Part A.* 2014; 118: 448–453. doi: [10.1016/j.saa.2013.09.028](#) PMID: [24080575](#)
31. Rafique B, Khalid AM, Akhtar K, Jabbar A. Interaction of anticancer drug methotrexate with DNA analyzed by electrochemical and spectroscopic methods. *Biosens. Bioelectron.* 2013; 44: 21–26. doi: [10.1016/j.bios.2012.12.028](#) PMID: [23384765](#)
32. Kashida H, Tanaka M, Baba S, Sakamoto T, Kawai G, Asanuma H, et al. Covalent incorporation of methyl red dyes into double-stranded DNA for their ordered clustering. *Chem. Eur. J.* 2006; 12: 777–784. PMID: [16163760](#)
33. Mansouri M, Pirouzi M, Saberi MR, Ghaderabad M, Chamani J. Investigation on the interaction between cyclophosphamide and lysozyme in the presence of three different kind of cyclodextrins: determination of the binding mechanism by spectroscopic and molecular modeling techniques. *Molecules* 2013; 18: 789–813. doi: [10.3390/molecules18010789](#) PMID: [23344194](#)
34. Dewey TG. *Biophysical and Biochemical Aspects of Fluorescence Spectroscopy*, Springer, New York, 1991.
35. Ware WR. Oxygen quenching of fluorescence in solution an experimental study of the diffusion process. *J. Phys. Chem.* 1962; 66: 455–458.
36. Shakir M, Azam M, Parveen S, Khan AU, Firdaus F. Synthesis and spectroscopic studies on complexes of N,N'-bis-(2-pyridinecarboxaldimine)-1,8-diaminonaphthalene (L); DNA binding studies on Cu (II) complex. *Spectrochim. Acta, Part A.* 2009; 71: 1851–1856.
37. Dorraji PS, Jalali F. Investigation of the interaction of sertraline with calf thymus DNA by spectroscopic methods. *J. Braz. Chem. Soc.* 2013; 24: 939–945.
38. Sahoo BK, Ghosh KS, Bera R, Dasgupta S. Studies on the interaction of diacetylcurcumin with calf thymus-DNA. *Chem. Phys.* 2008; 351: 163–169.
39. Lincoln P, Tuite E, Norden B. Short-circuiting the molecular wire—cooperative binding of A-[Ru(phen)<sub>2</sub>dppz]<sup>2+</sup> and Δ-[Rh(phi)<sub>2</sub>Bipy]<sup>3+</sup> to DNA. *J. Am. Chem. Soc.* 1997; 119: 1454–1455.
40. Dogra S, Awasthi P, Nair M, Barthwal R. Interaction of anticancer drug mitoxantrone with DNA hexamer sequence d-(CTCGAG)<sub>2</sub> by absorption, fluorescence and circular dichroism spectroscopy. *J. Photochem. Photobiol., B.* 2013; 123: 48–54. doi: [10.1016/j.jphotobiol.2013.03.015](#) PMID: [23624101](#)
41. Zhang G, Zhang Y, Zhang Y, Li Y. Spectroscopic studies of cyanazine binding to calf thymus DNA with the use of ethidium bromide as a probe. *Sens. Actuators, B.* 2013; 182: 453–460.
42. Han L, Zhou Y, Huang X, Xiao M, Zhou L, Wang A, et al. A multi-spectroscopic approach to investigate the interaction of prodigiosin with ct-DNA. *Spectrochim. Acta, Part A.* 2014; 123: 487–502.
